# Supplementary material
Source: PubMed Central journal article supplement (PMC8852805)
Supplement: NIHMS1754306-supplement-supinfo.pdf [file NIHMS1754306-supplement-supinfo.pdf]

## On-line Supplementary Material

Martins et al. Metabolic adaptation delays time to reach weight loss goals

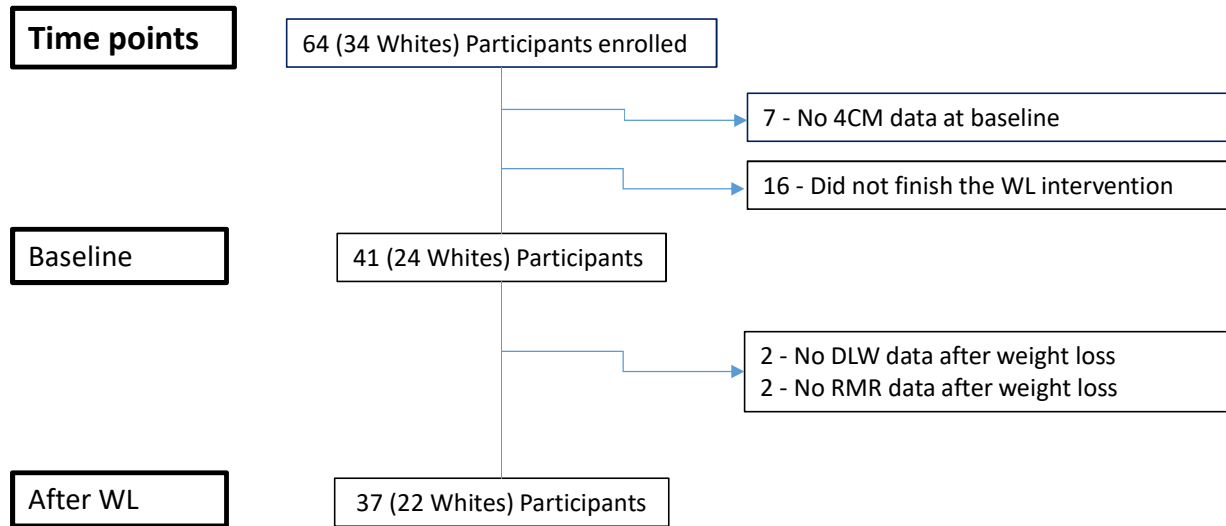

### Supplementary methods A. Flowchart ROMEO study

4CM: 4 Compartment Model; WL: weight loss; RMR: resting metabolic rate; DLW: double labeled water

On-line Supplementary Material

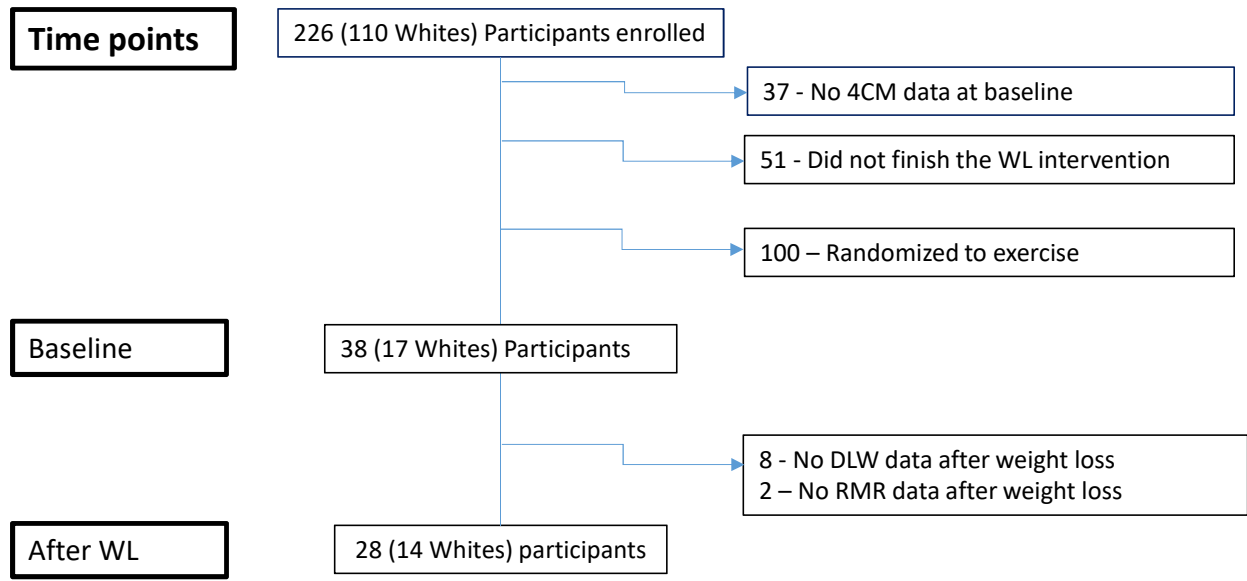

Supplementary methods B. Flowchart JULIET study

4CM: 4 Compartment Model; WL: weight loss; DLW: double labeled water
